# Supplementary material for: Trends in Bacterial Pathogens of Bats: Global Distribution and Knowledge Gaps
Source: Hindawi journal article supplement (doi:10.1155/2023/9285855), 2023-03-27

**A****Legend**

- Family present, sampled, pathogen detected
- Family present, sampled, pathogen not detected
- Family present, not sampled
- Family not present

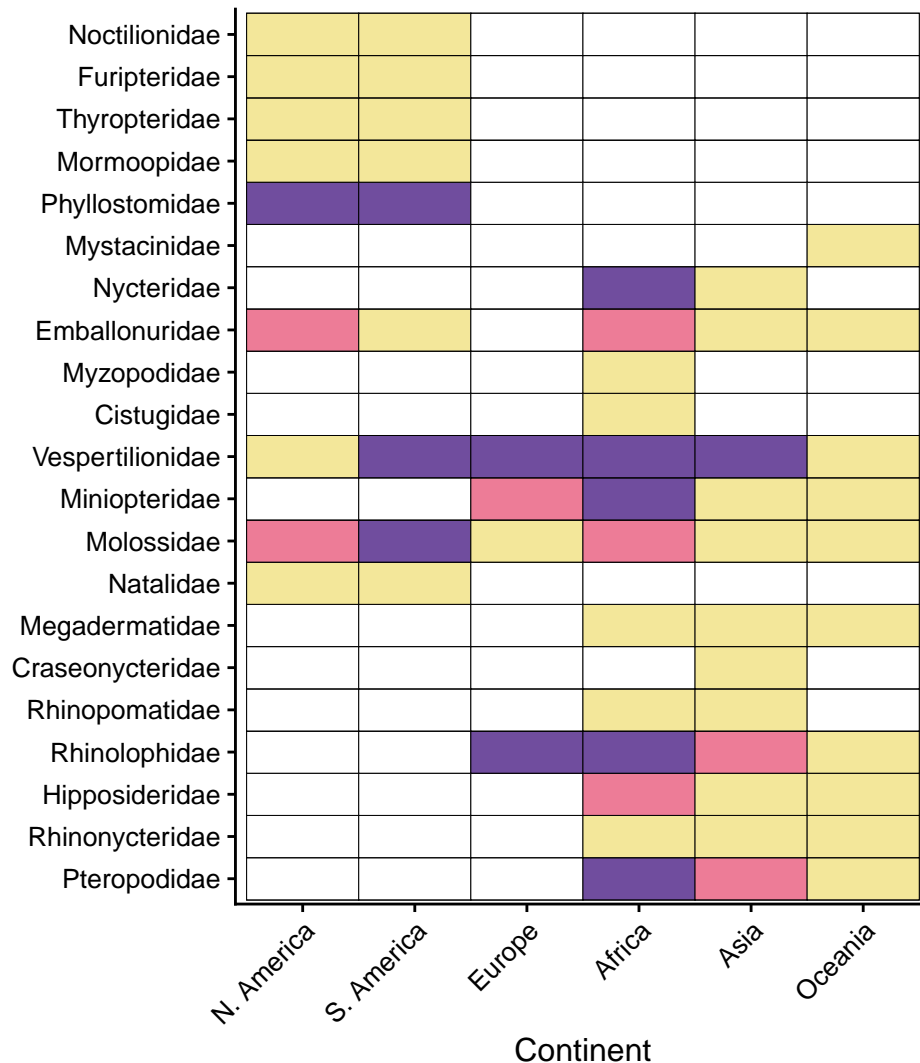**B****Species**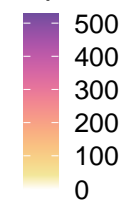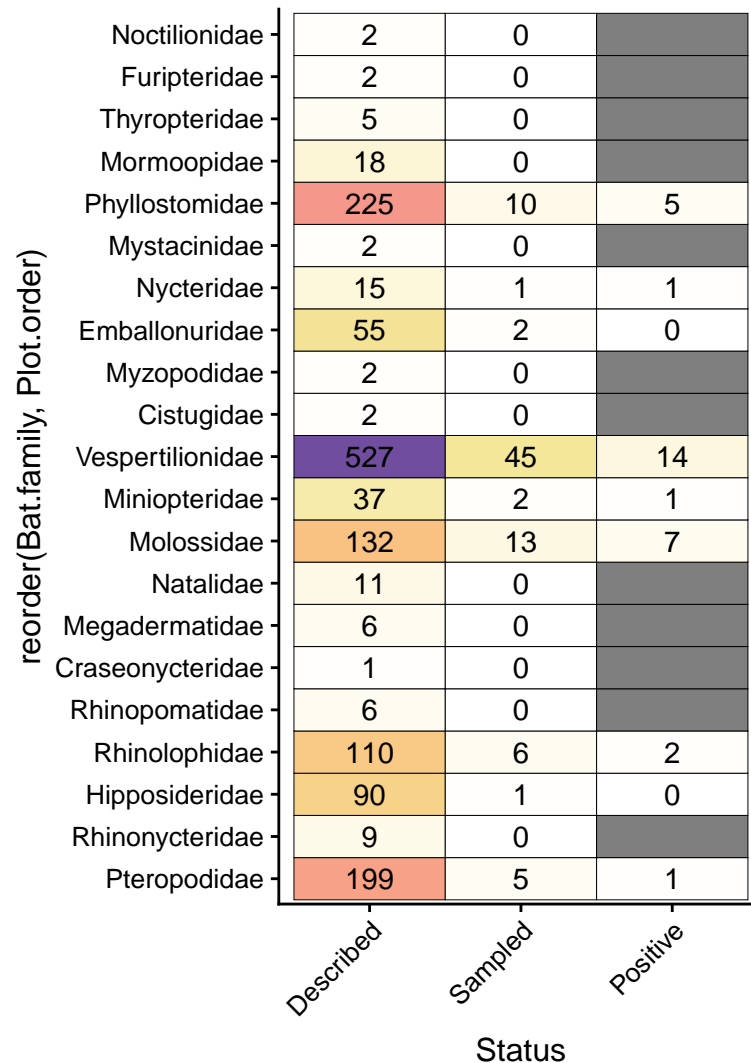

Supplement: f1 [file 9285855.f1.zip]
