# Supplementary figures and images for: Trends in Bacterial Pathogens of Bats: Global Distribution and Knowledge Gaps
Source: Hindawi journal article supplement (doi:10.1155/2023/9285855), 2023-03-27

**A****Legend**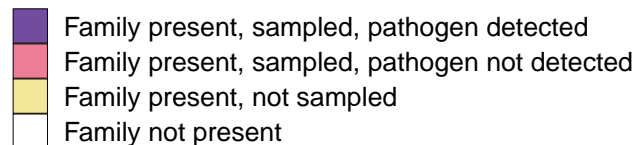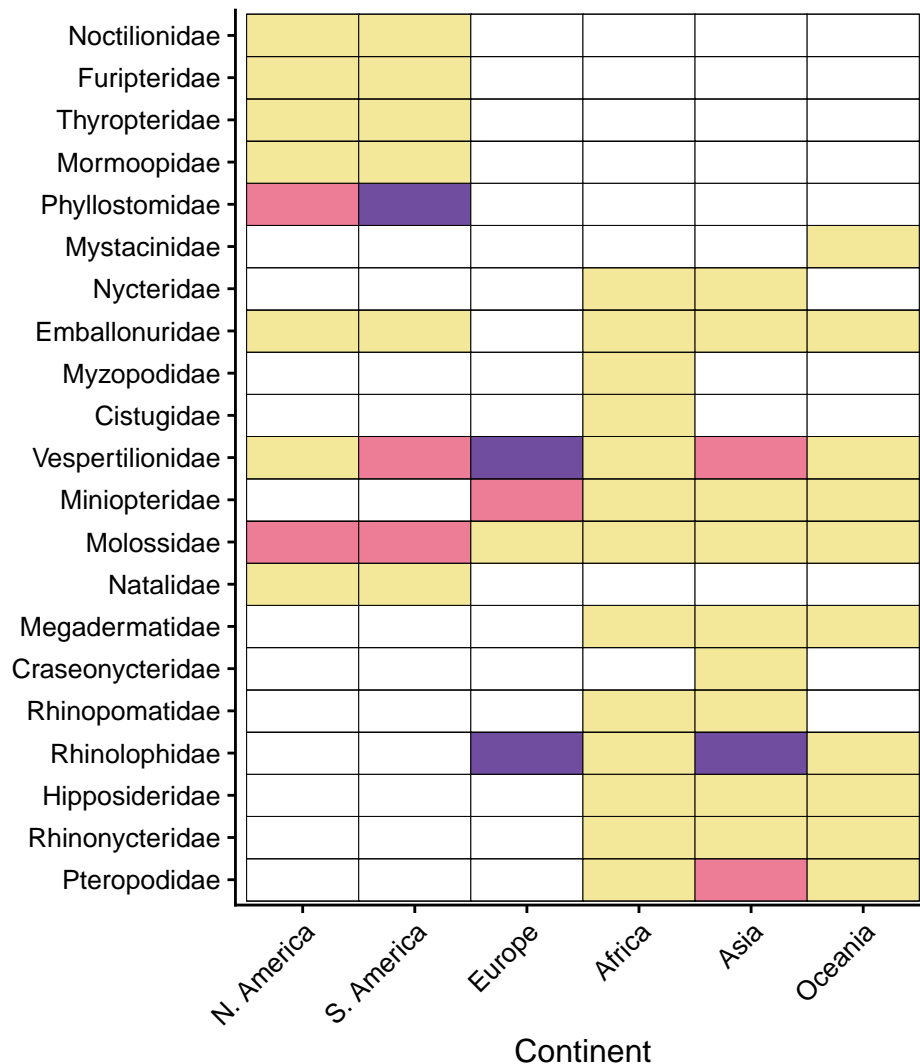**B****Species**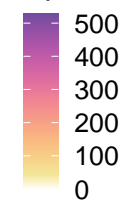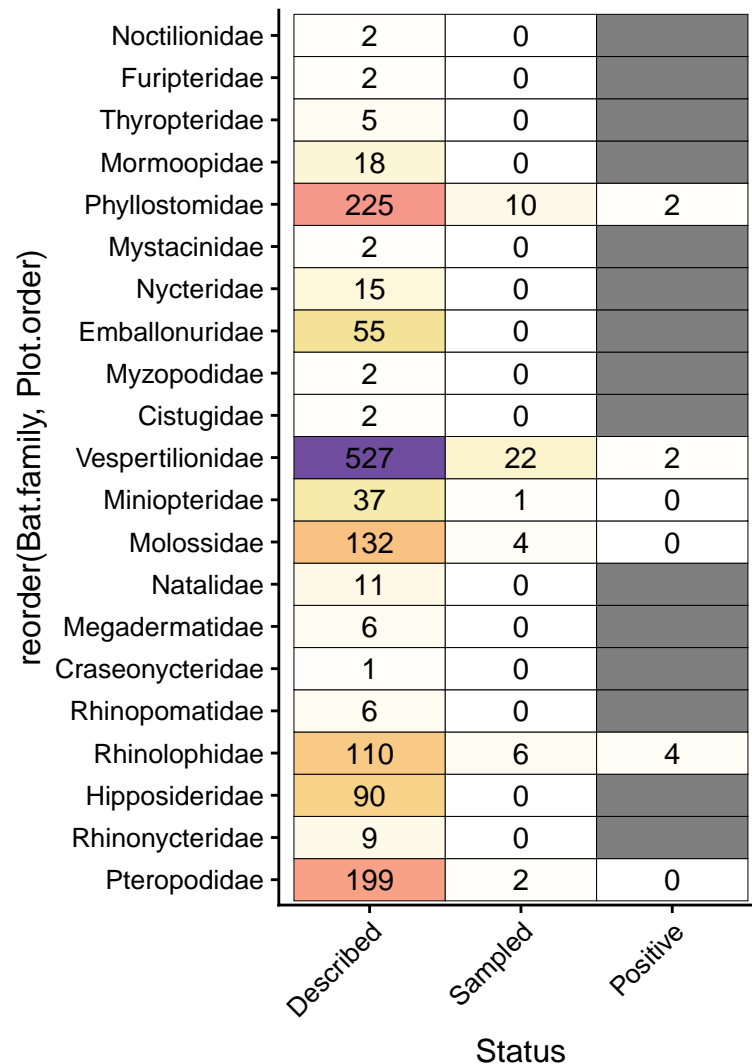

Supplement: f1 [file 9285855.f1.zip]

**A**

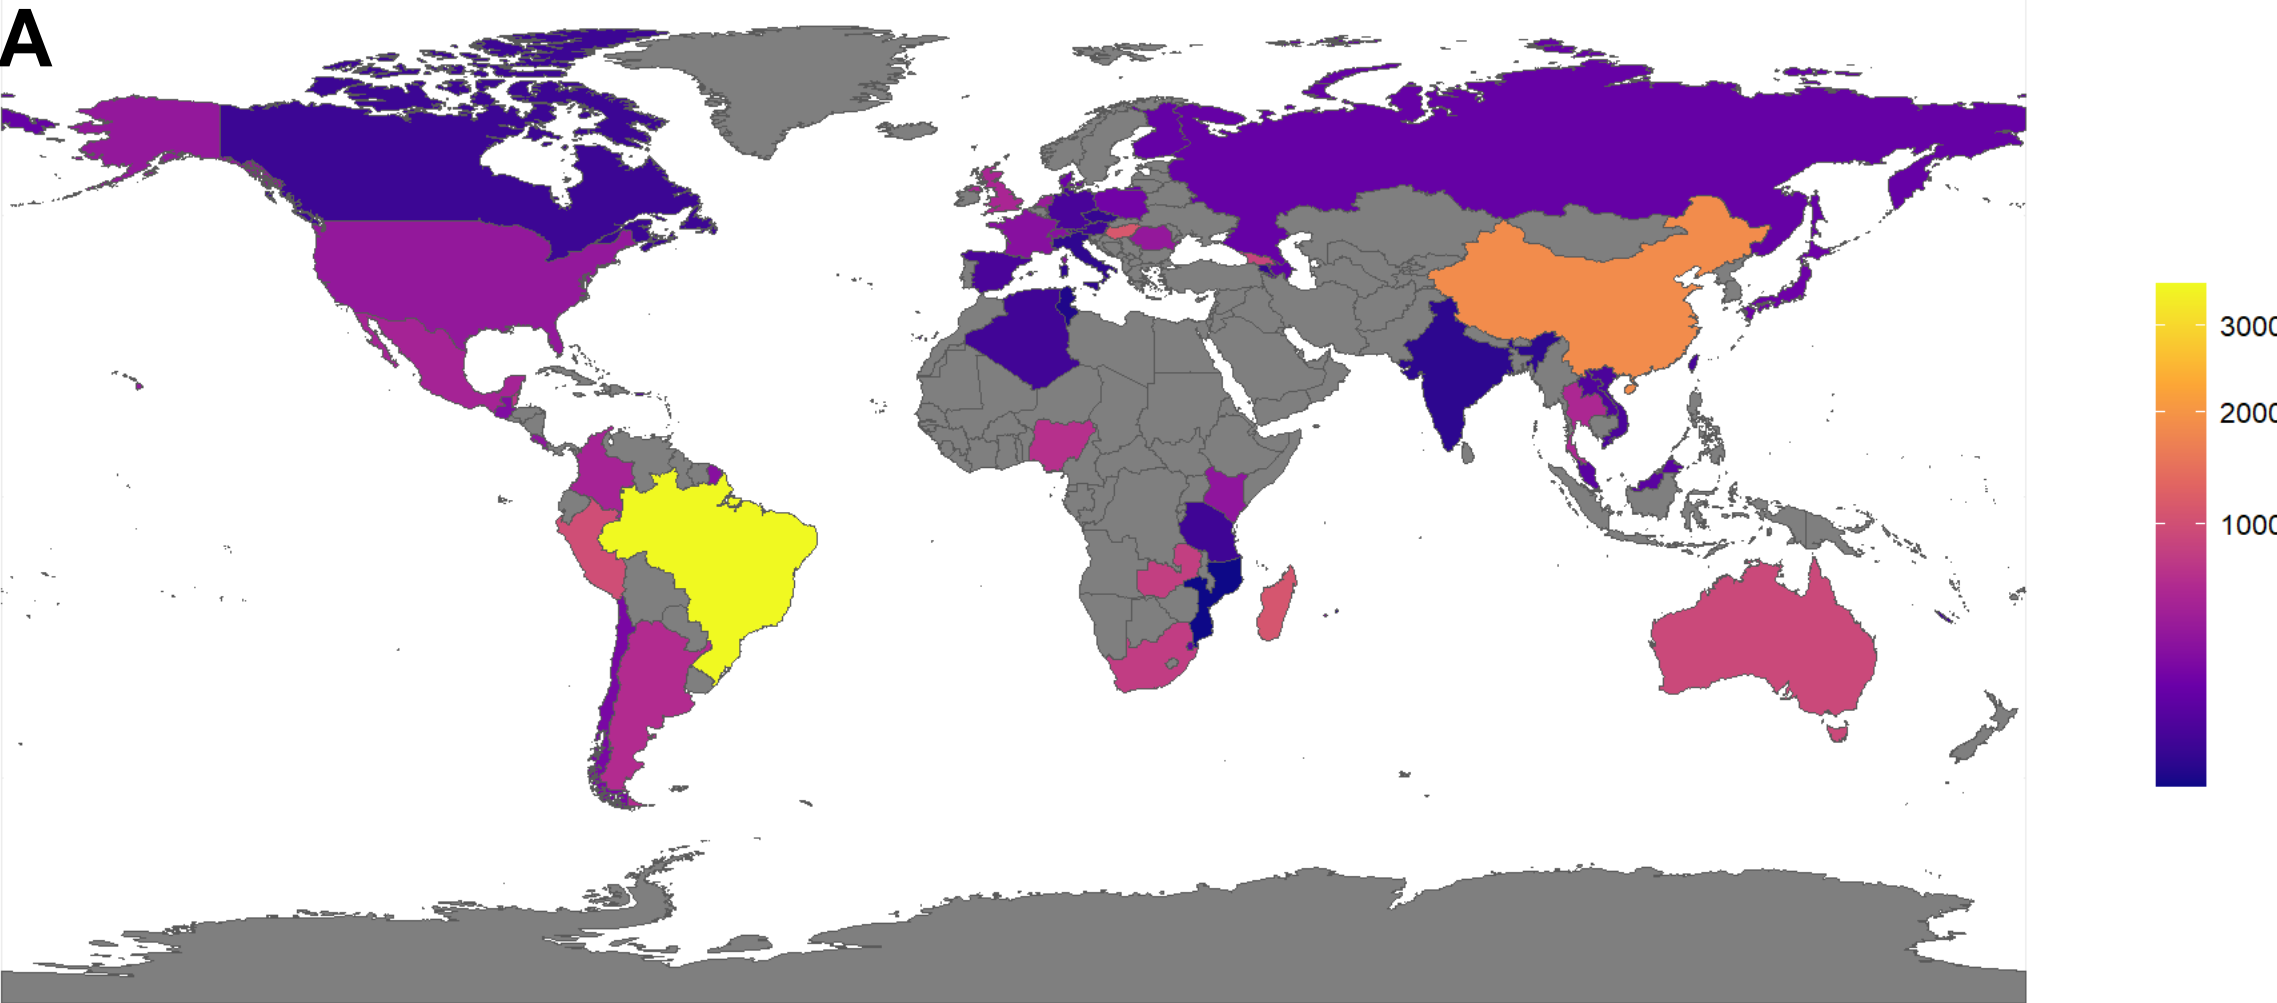

**B**

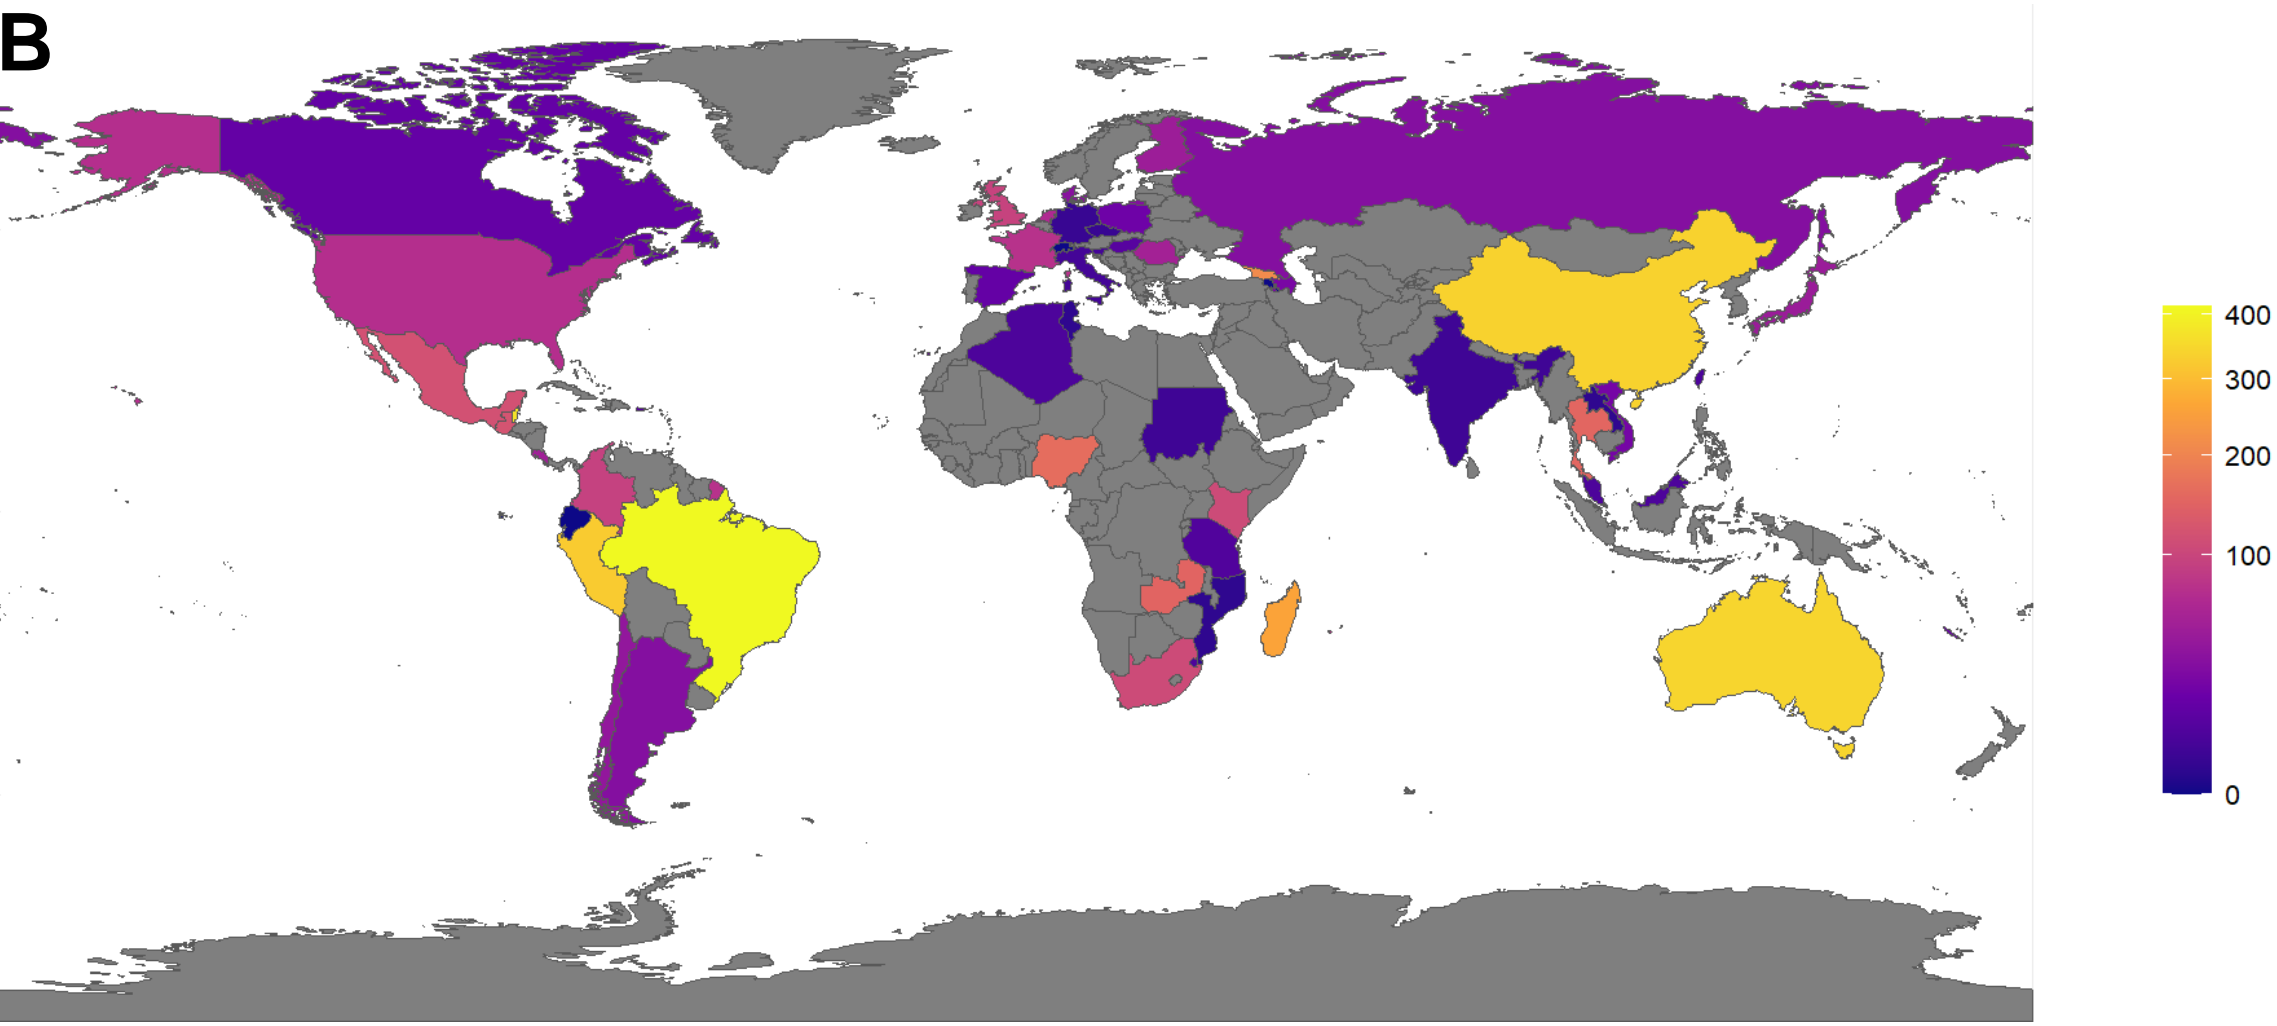

Supplement: f1 [file 9285855.f1.zip]

**A****Legend**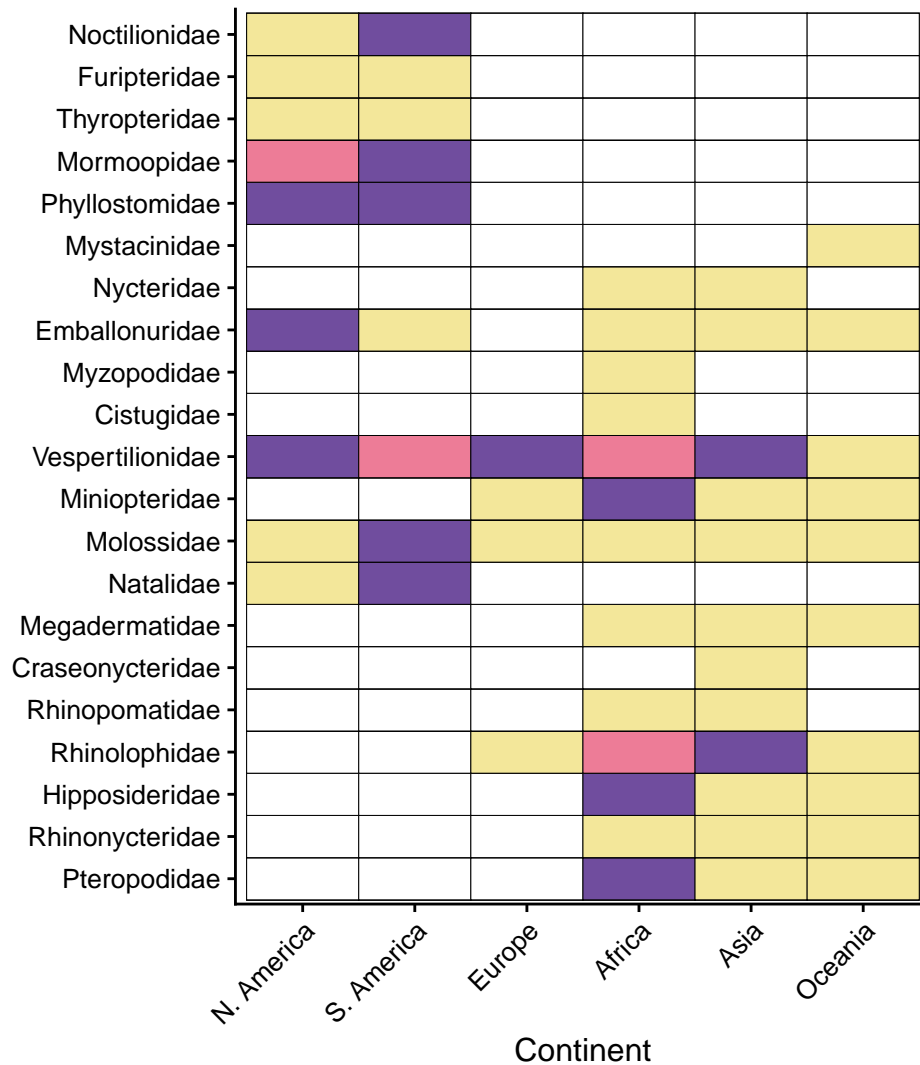**B****Species**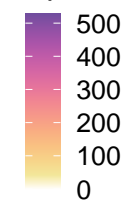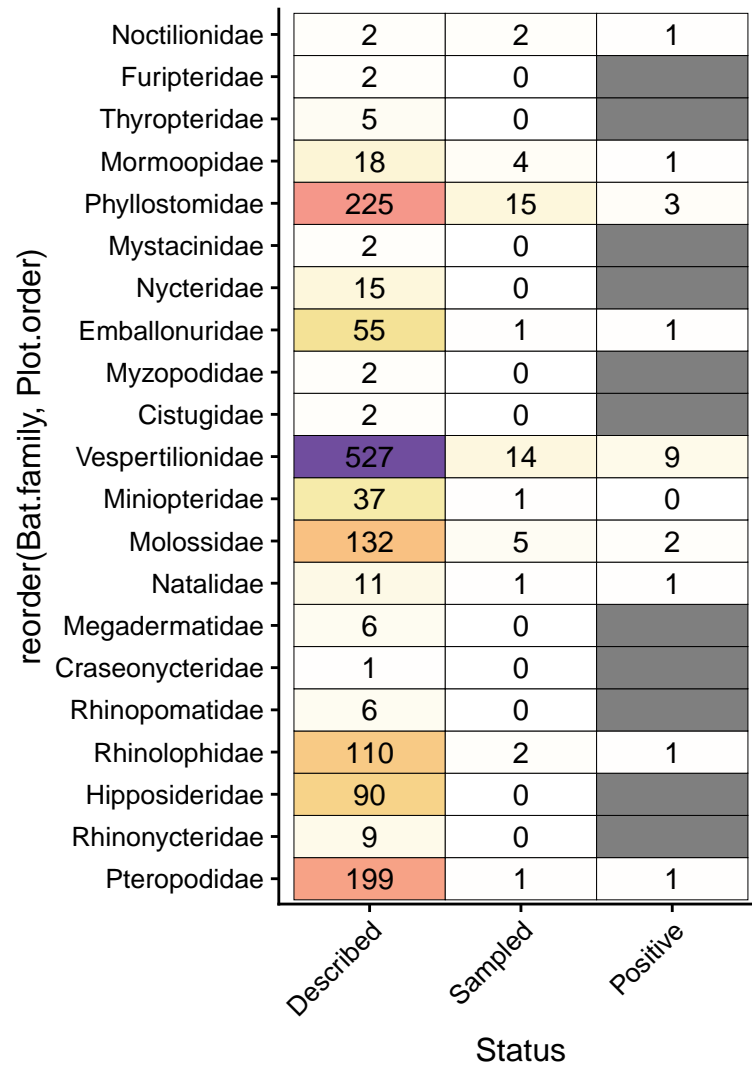

Supplement: f1 [file 9285855.f1.zip]

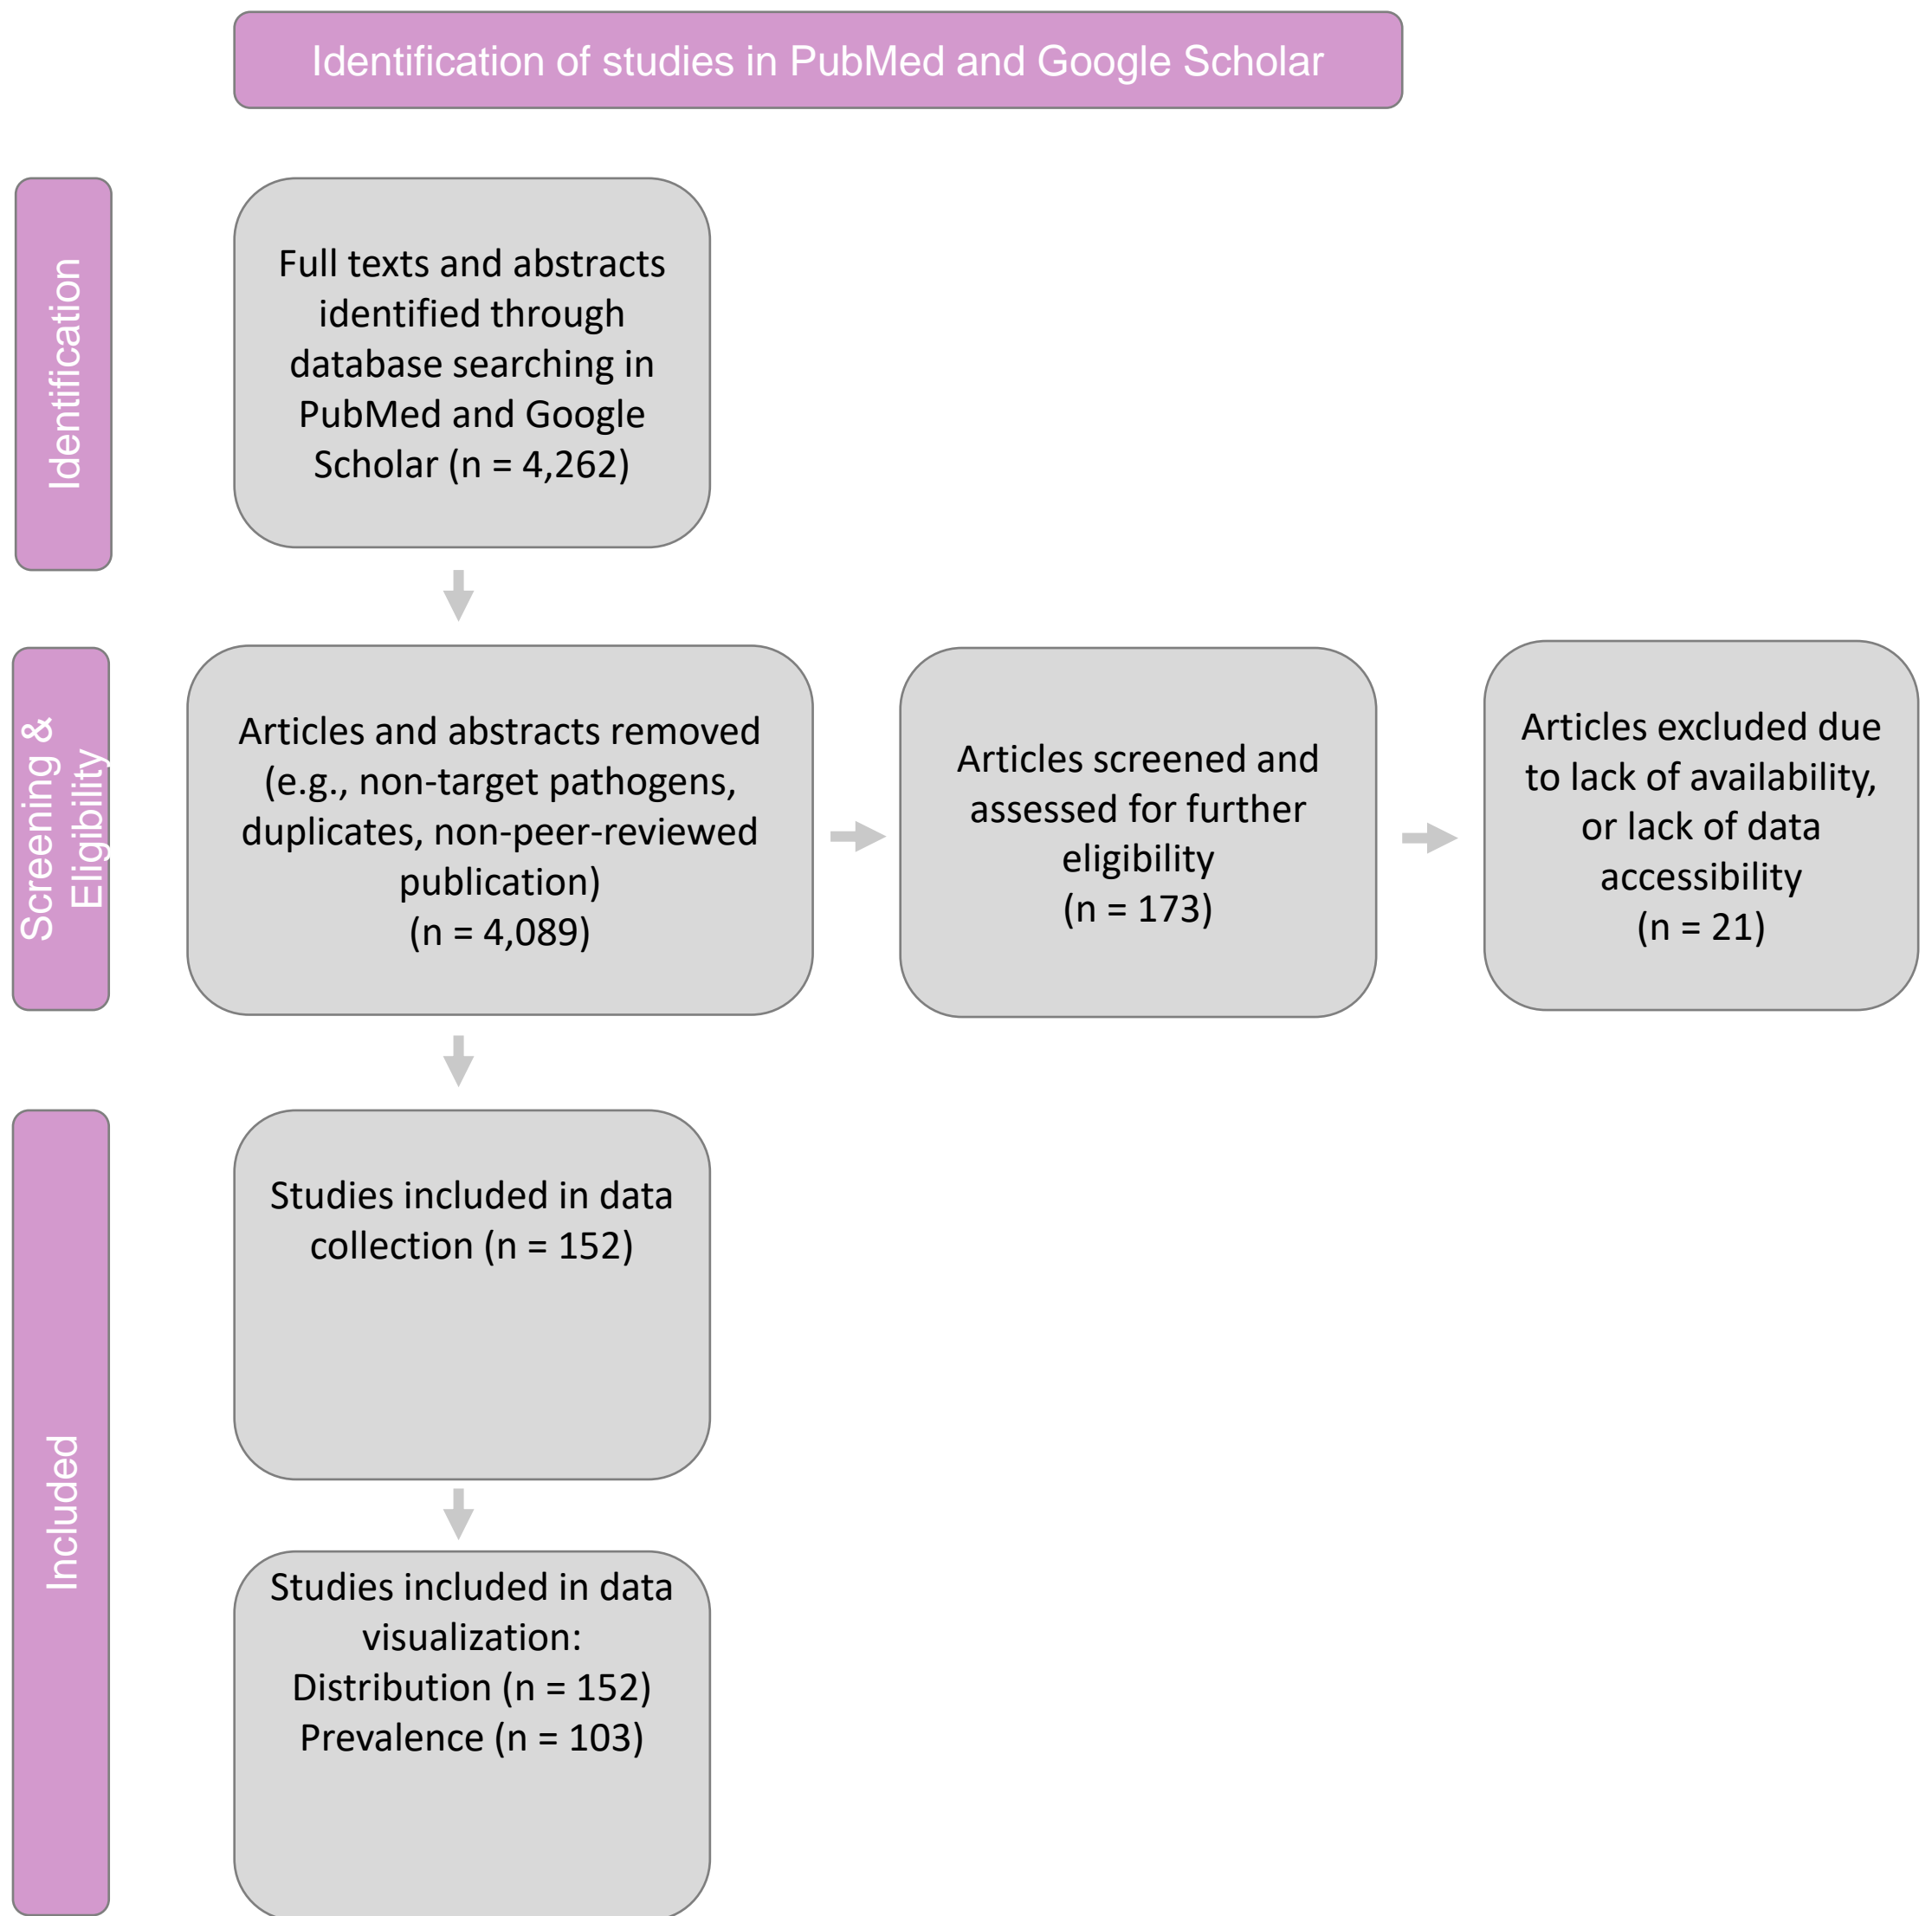

Supplement: f1 [file 9285855.f1.zip]

**A****Legend**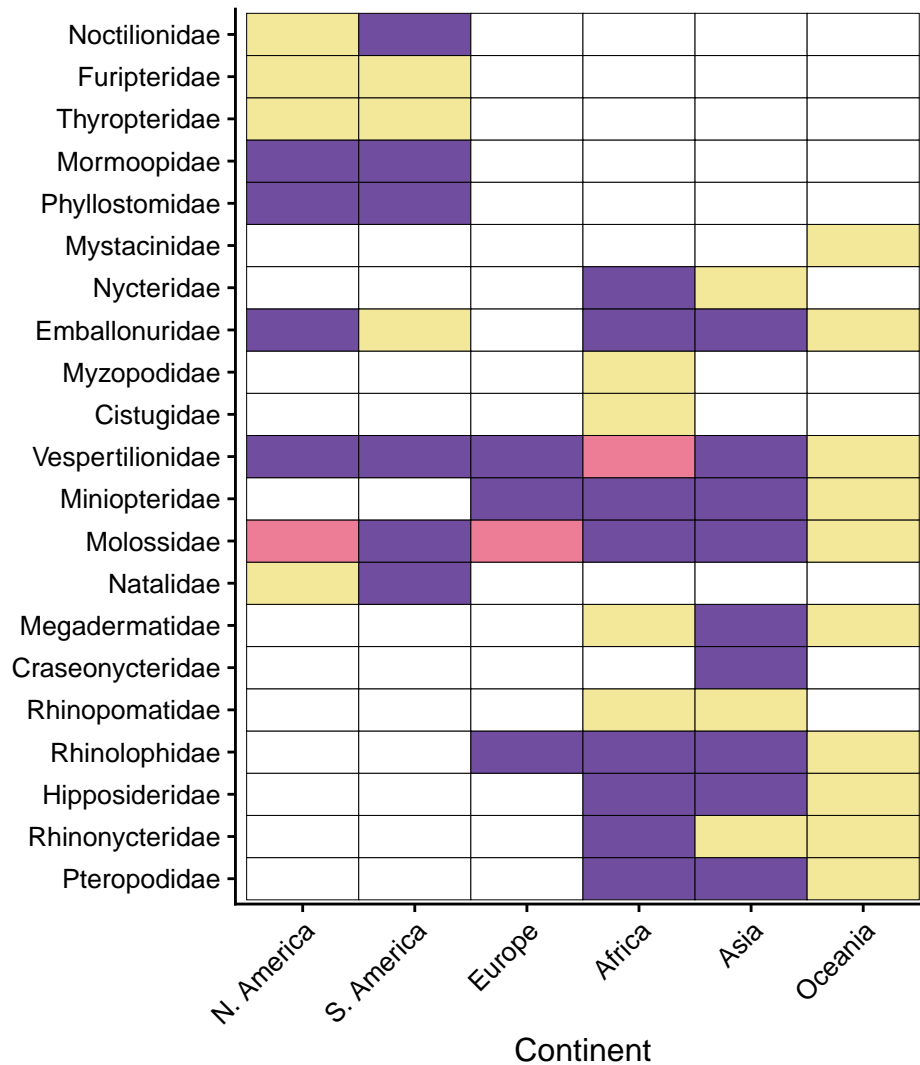**B****Species**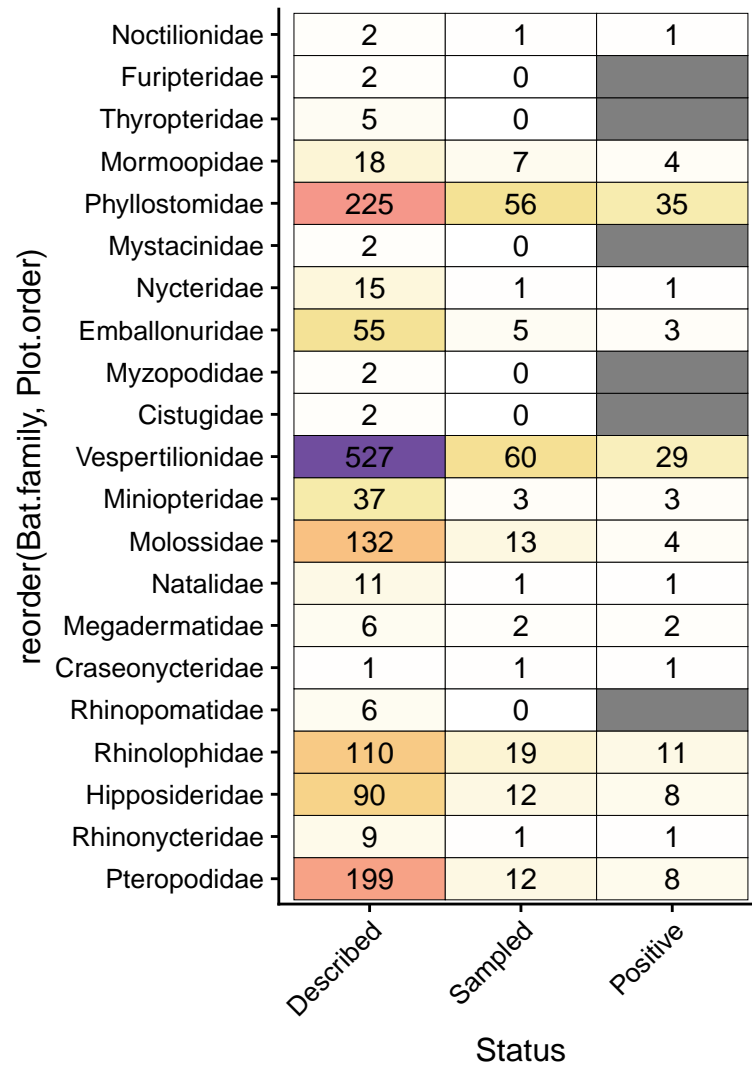

Supplement: f1 [file 9285855.f1.zip]
